# Supplementary material for: In Vivo CRISPR Gene Editing in Patients with Herpes Stromal Keratitis
Source: bioRxiv or medRxiv preprint supplement (doi:10.1101/2023.02.21.23285822), 2023-02-24

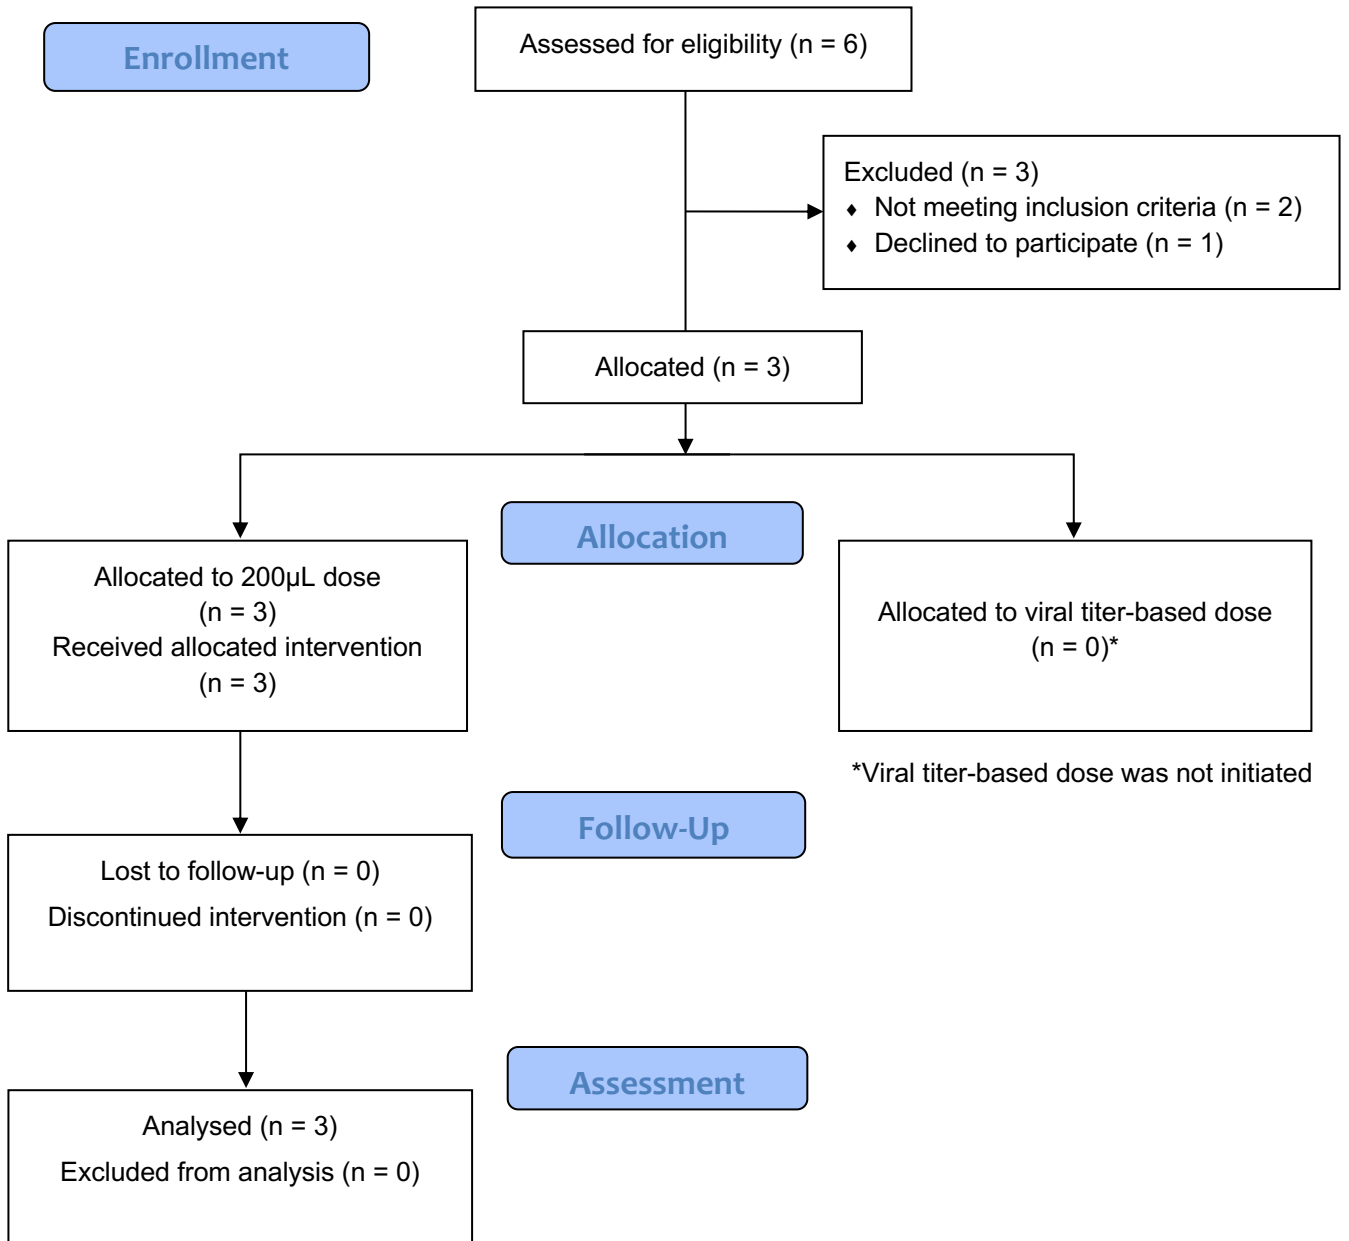

Supplement: Supplementary file [file media-3.pdf]
